# Supplementary material for: Anion-modulated, highly sensitive supramolecular fluorescence chemosensor for C70
Source: Royal Society of Chemistry journal article supplement (doi:10.1039/c0cc00631a), 2010-01-01
Supplement: c0cc00631a.pdf [file c0cc00631a.pdf]

Electronic Supplementary Information

## Anion-modulated, highly sensitive supramolecular fluorescence chemosensor for C<sub>70</sub>

Jaeduk Yoo,<sup>a</sup> Youngmee Kim,<sup>b</sup> Sung-Jin Kim,<sup>b</sup> and Chang-Hee Lee<sup>\*, a</sup>

<sup>a</sup>*Department of Chemistry and Institute of molecular Science & Fusion technology, Kangwon National University, Chun-Chon 200-701 Korea*. <sup>b</sup>*Department of Chemistry and Nano Science, Ewha Womans University Seoul 120-750, Korea*

### Experimental

**General:** <sup>1</sup>H NMR, <sup>13</sup>C NMR spectra (300 or 400 MHz) were recorded using TMS as the internal standard. Fluorescence titration studies were carried out at 298 K. Toluene/acetonitrile (5%) solutions of the receptor or substrate were titrated by adding known quantities of a concentrated solution of the corresponding substrate or receptor. The data were fitted to a 1:1 receptor-to-substrate binding profile according to the method of Oster<sup>1</sup> using the changes in the emission. Job plots were obtained using emission spectra that spectra were recorded on a Perkin Elmer LS-55B at 298 K. All reagents were obtained from Aldrich or TCI used as received unless noted otherwise.

**X-ray Crystallography:** The X-ray diffraction data were collected on a Bruker SMART APEX diffractometer equipped with a monochromator in the Mo K $\alpha$  ( $\lambda = 0.71073 \text{ \AA}$ ) incident beam. A crystal was mounted on a glass fiber. The CCD data were integrated and scaled using the Bruker-S SAINT software package, and the structure was solved and refined using SHELXTL V6.12.<sup>2</sup> All hydrogen atoms were placed in the calculated positions. The crystallographic data are listed in Table 1. Tables of positional and thermal parameters, bond lengths and angles, and torsion angles are located in tables 2 through 6.

### References

1. *Binding Constants: The Measurement of Molecular Complex Stability*. Connors, A. K. Wiley: New York, 1987.
2. Bruker, SHELXTL/PC. Version 6.12 for Windows XP. 2001, Bruker AXS Inc., Madison, Wisconsin, USA.

#### 1, 3-Bis(2-(hydroxy)propan-2-yl)pyrene(1)

1,3-Acetylpyrene (0.572 g, 0.002 mole) was dissolved in dry THF (30 mL) under N<sub>2</sub> atmosphere, then CH<sub>3</sub>MgBr (3.3 mL, 0.04 mole) was added dropwise over a period of 5 min at 0 °C. The whole mixture was stirred for 12 h at 0 °C. Then, the reaction was quenched by adding aqueous saturated NaHCO<sub>3</sub> (20 mL). The mixture was extracted with ethyl acetate and the organic layer was dried (Na<sub>2</sub>SO<sub>4</sub>) and solvent was removed in vacuo. The purification by silica gel column chromatography (CH<sub>2</sub>Cl<sub>2</sub>/EtOAc = 19/1) yielded **4** (0.430 g, 67 %) as yellow solid. <sup>1</sup>H NMR (CDCl<sub>3</sub>)  $\delta$  9.07 (d, 2H,  $J = 9.52$  Hz), 8.36 (s, 1H), 8.16 (d, 2H,  $J = 7.58$  Hz), 8.06 (d, 2H,  $J = 9.52$  Hz), 7.99 (t, 1H,  $J = 7.58$  Hz), 2.17 (s, 2H), 2.02 (s, 12H); <sup>13</sup>C NMR (CDCl<sub>3</sub>)  $\delta$  140.63, 131.06, 128.60, 127.77, 126.91, 126.50, 126.34, 125.74, 125.54, 120.94, 75.17, 32.64; FAB-MS Calcd for C<sub>22</sub>H<sub>22</sub>O<sub>2</sub> 318.162, Found 318.1622(M), 319.1612(M + 1),

#### 1, 3-Bis(2-(1H-pyrrol-2-yl)propan-2-yl)pyrene (2)

Compound **3** (0.5 g,  $1.57 \times 10^{-3}$  mole) and pyrrole (11 mL, 0.157 mole) were dissolved in  $\text{CH}_2\text{Cl}_2$  (10 mL) with stirring, then  $\text{BF}_3 \cdot \text{OEt}_2$  (276  $\mu\text{L}$ ,  $2.20 \times 10^{-4}$  mole) were added. The whole mixture was stirred for 15 min at 25 °C. Then, aqueous NaOH (30 mL, 1N) was added to the solution. The mixture was extracted with  $\text{CH}_2\text{Cl}_2$  (20 mL X 3) and the organic layer was dried ( $\text{Na}_2\text{SO}_4$ ). The solvent and excess pyrroles were removed in vacuo. The purification by silica gel column chromatography ( $\text{CH}_2\text{Cl}_2/\text{Hexanes} = 7/3$ ) yielded **5** (0.430 g, 74 %) ;  $^1\text{H}$  NMR ( $\text{CDCl}_3$ )  $\delta$  8.53 (s, 1H), 8.03 (d, 2H,  $J = 9.50$  Hz), 8.02 (d, 2H,  $J = 7.52$  Hz), 7.89 (t, 1H,  $J = 7.59$  Hz), 7.78 (d, 2H,  $J = 9.52$  Hz), 7.49 (br s, 2H), 6.50-6.46 (m, 2H), 6.32-6.31(m, 2H), 6.25-6.23 (q, 2H,  $J = 4.55$  Hz), 2.05 (s, 12H) ;  $^{13}\text{C}$  NMR ( $\text{CDCl}_3$ )  $\delta$  142.68, 140.38, 130.88, 129.21, 127.71, 127.01, 126.42, 125.51, 125.39, 125.27, 123.31, 116.68, 108.56, 103.04, 58.89, 41.09, 32.42, 18.81 ; FAB-MS Calcd for  $\text{C}_{30}\text{H}_{28}\text{N}_2$  416.2252, Found 416.2252(M), 417.2287(M + 1)

### Calix[1]pyreno[3]pyrrole (**3**)

Compound **2** (0.1 g,  $2.4 \times 10^{-4}$  mole), pyrrole (16.6  $\mu\text{L}$ ,  $2.4 \times 10^{-4}$  mole) and acetone (37  $\mu\text{L}$ ,  $4.8 \times 10^{-4}$  mole) was dissolved in  $\text{CH}_2\text{Cl}_2$  (20 mL) with stirring, then TFA (20  $\mu\text{L}$ ,  $2.5 \times 10^{-4}$  mole) was added. The whole mixture was stirred for 24 hr at 25 °C. Then, triethyl amine (300  $\mu\text{L}$ ) and water (20 mL) were added to the solution. The mixture was then extracted with  $\text{CH}_2\text{Cl}_2$  (10 mL x 3). The organic layer was dried ( $\text{Na}_2\text{SO}_4$ ) and solvent was removed in vacuo. The purification by silica gel column chromatography ( $\text{CH}_2\text{Cl}_2/\text{Hexanes} = 1/1$ ) yielded **1** (0.012 g,  $5.0 \times 10^{-4}$  mole, 9%) ;  $^1\text{H}$  NMR ( $\text{CD}_3\text{CN}$ )  $\delta$  8.61 (br s, 1H), 8.47 (d, 2H,  $J = 9.47$  Hz), 8.14 (d, 2H,  $J = 7.61$  Hz), 7.97 (t, 1H,  $J = 7.57$  Hz), 7.93 (d, 2H,  $J = 9.54$  Hz), 7.74(s, 1H), 7.00 (br s, 2H), 6.20 (t, 2H,  $J = 3.13$  Hz), 5.94 (t, 2H,  $J = 3.01$  Hz), 5.52 (d, 2H,  $J = 2.84$  Hz), 1.88 (s, 12H), 1.44 (s, 12H;  $^{13}\text{C}$  NMR ( $\text{CD}_3\text{CN}$ )  $\delta$  140.78, 139.35, 139.33, 137.08, 130.17, 127.07, 126.42, 126.03, 125.57, 125.02, 124.99, 124.62, 124.55, 103.85, 102.65, 101.08, 40.56, 35.06, 29.78, 28.79 ; MALDI-TOF Calcd for  $\text{C}_{40}\text{H}_{41}\text{N}_3$  563.33, Found 563.29(M), 576.30 (M +  $\text{Na}^+$ ), 588.33 (M +  $\text{K}^+$ )



**Figure 3.** FAB-MS spectrum of compound 1

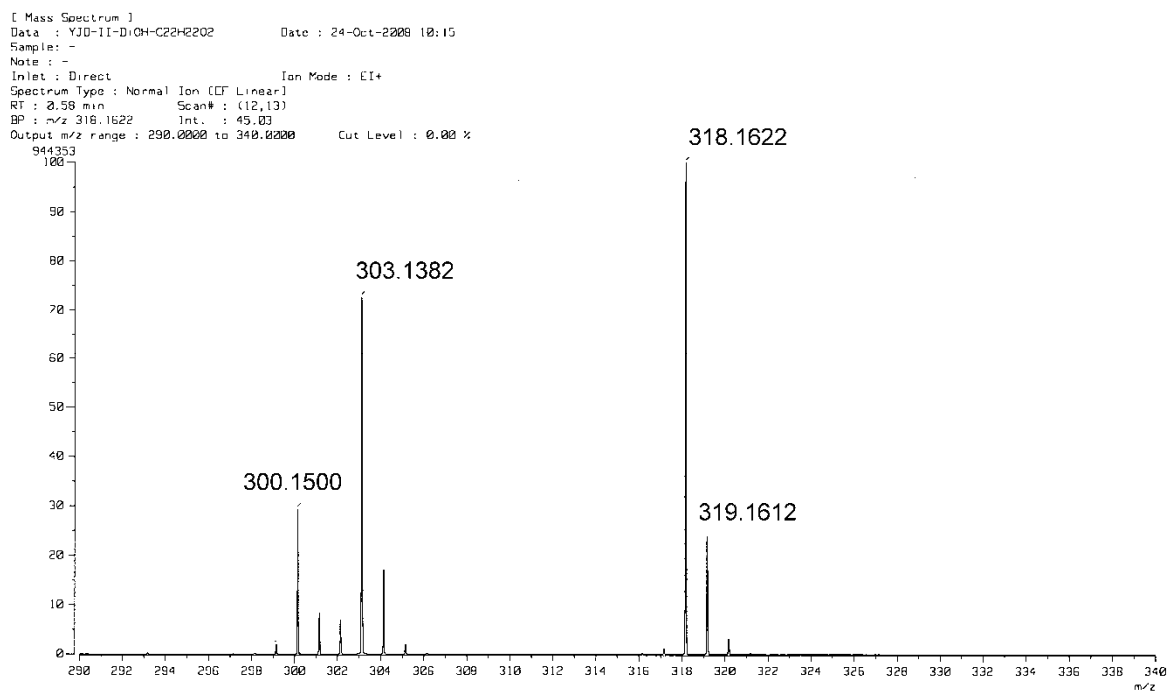

**Figure 4.**  $^1\text{H}$  NMR spectrum of compound 2 in  $\text{CDCl}_3$

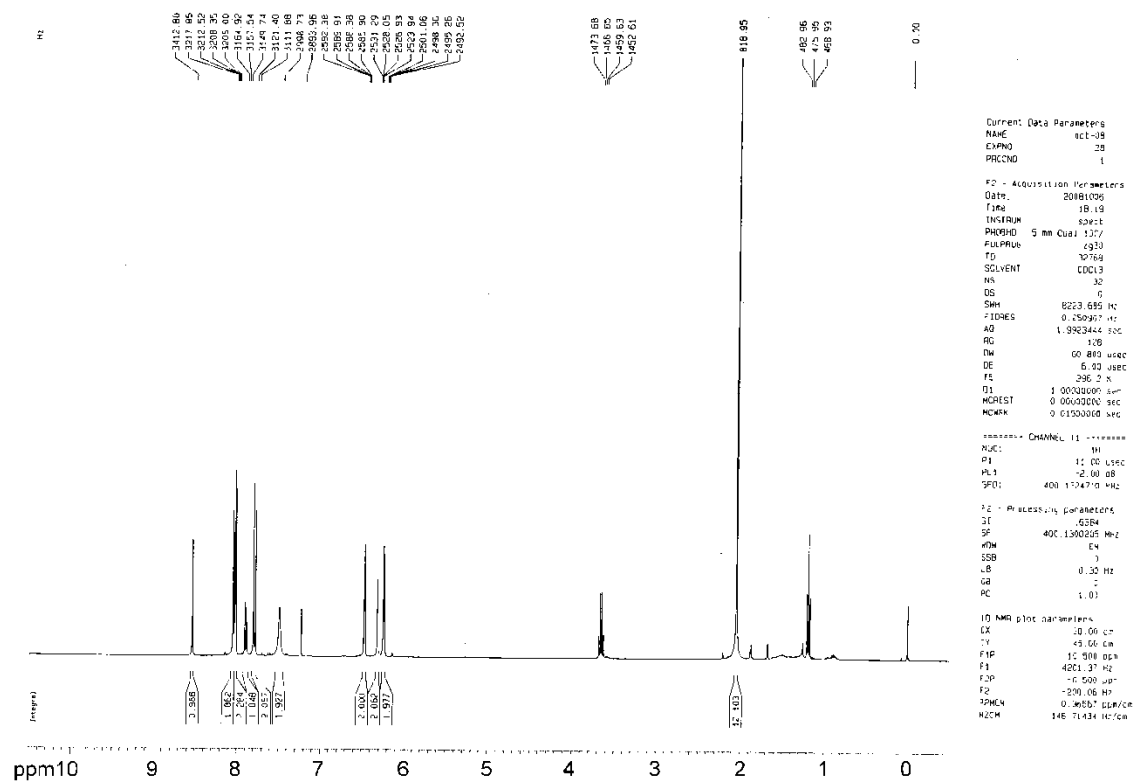

Figure 5.  $^{13}\text{C}$  NMR spectrum of compound 2 in  $\text{CDCl}_3$

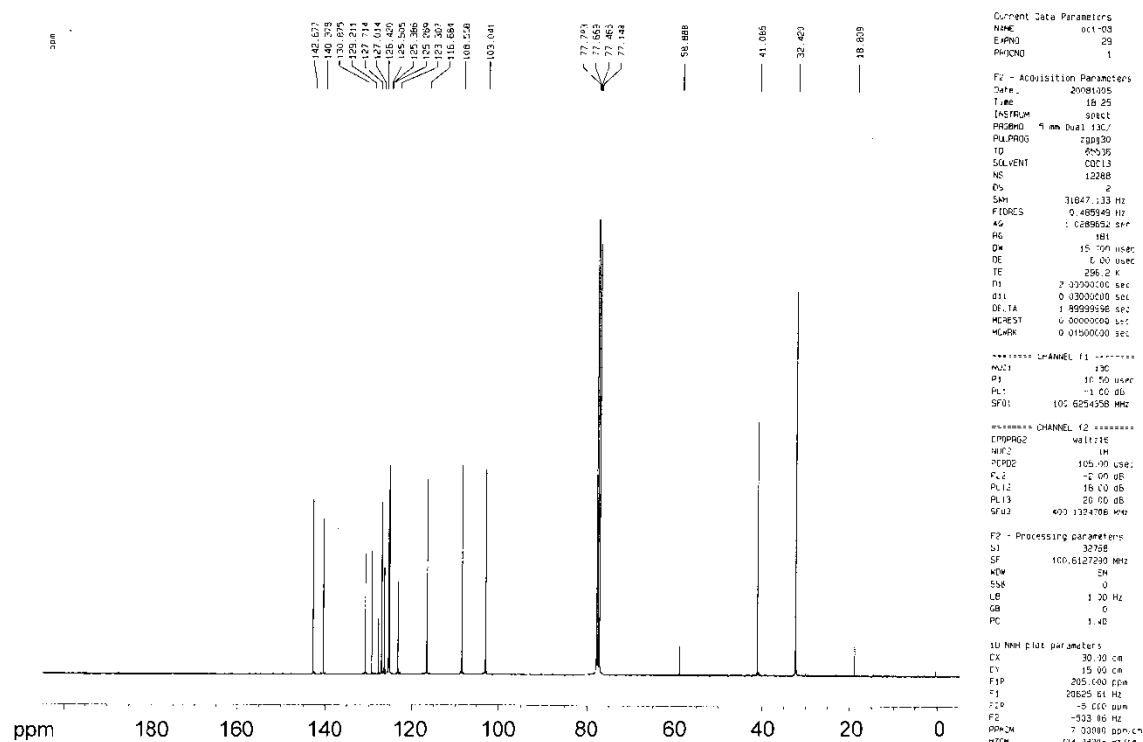

Figure 6. FAB-MS spectrum of compound 2

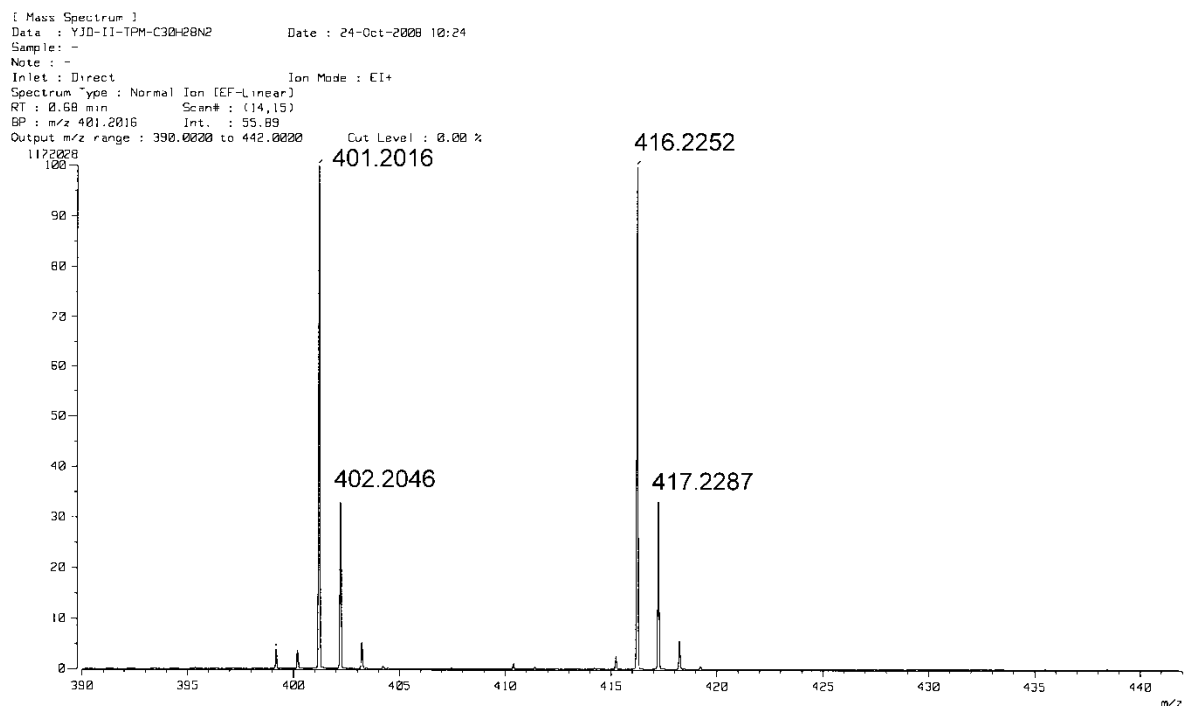

Figure 7. <sup>1</sup>H NMR spectrum of receptor 3 in CD<sub>3</sub>CN

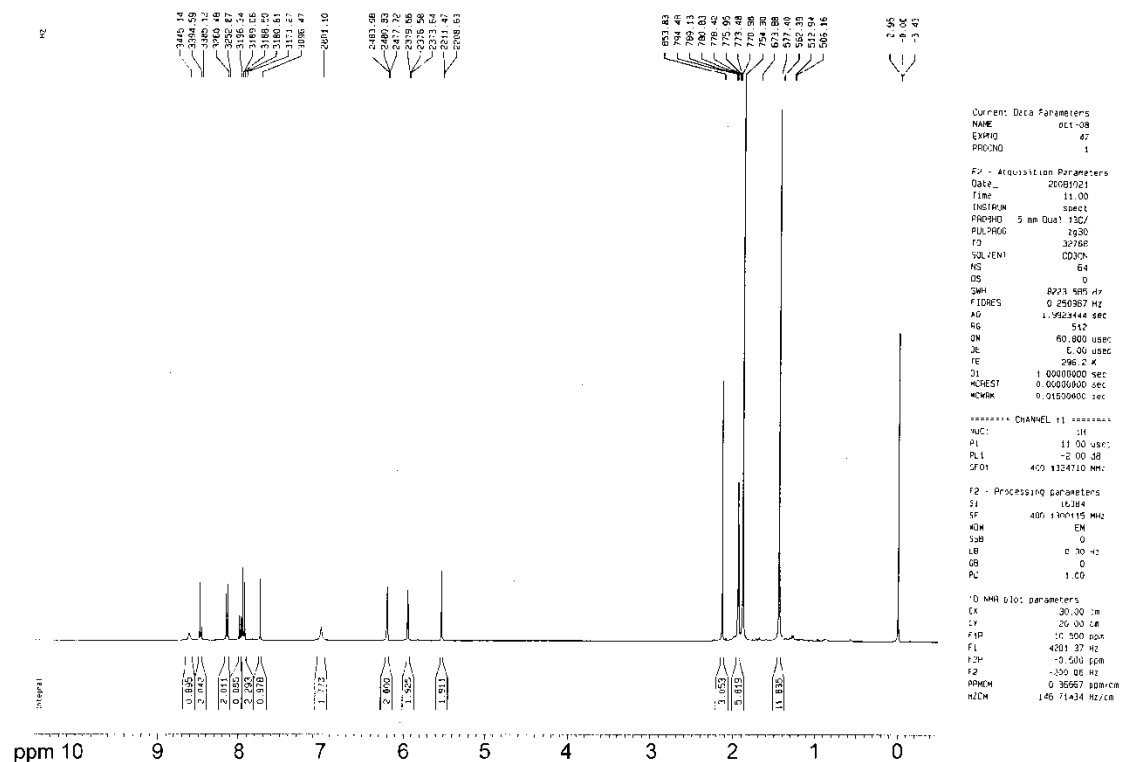

Figure 8. <sup>13</sup>C NMR spectrum of c receptor 3 in CD<sub>3</sub>CN

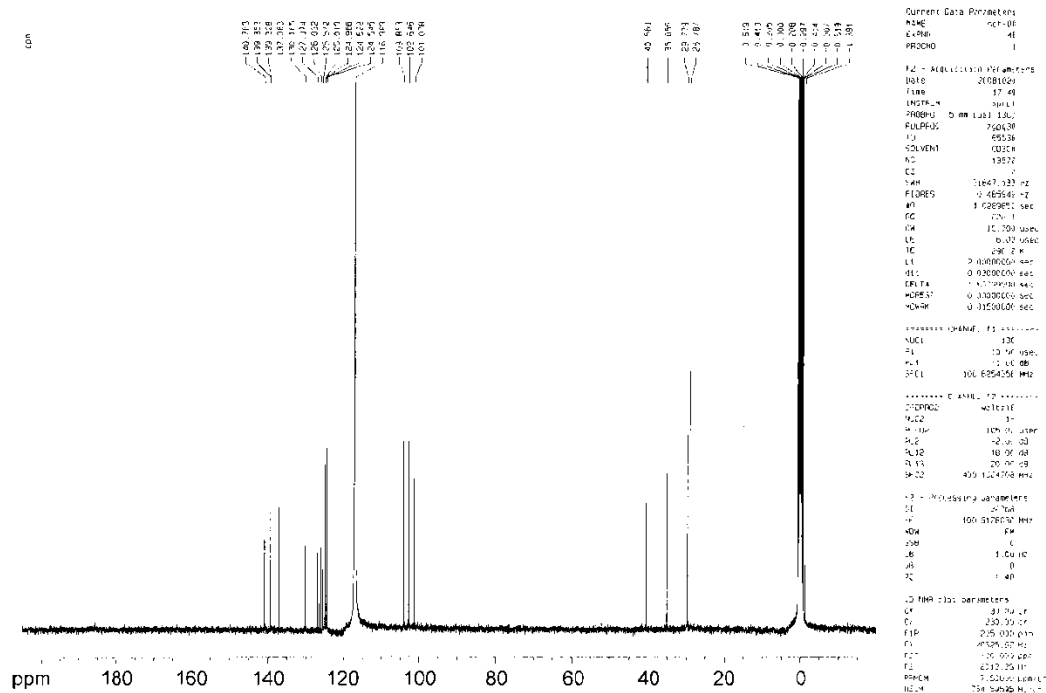

Figure 9. MALDI-TOF MS spectrum of receptor 3

Applied Biosystems Voyager System 4372

Voyager Spec #1=>NF1.0=>NR(2.00)[BP = 563.3, 30808]

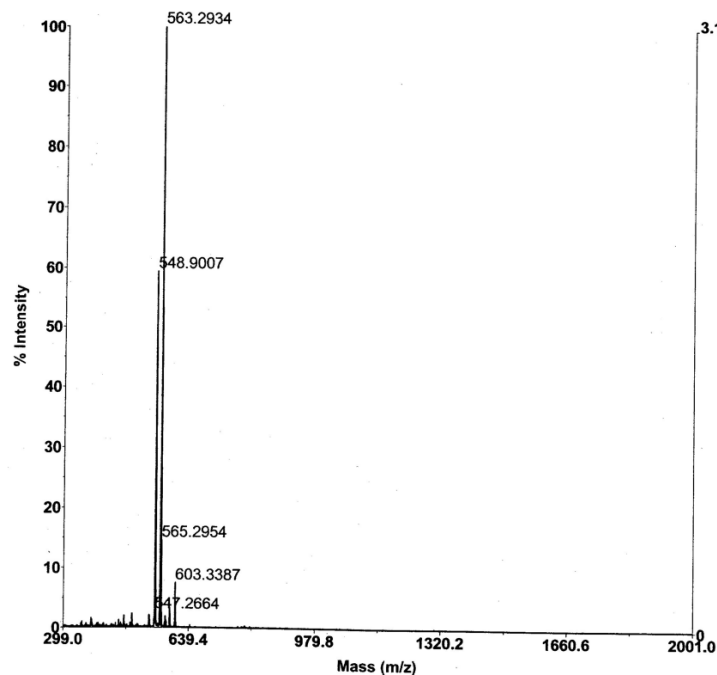

Mode of operation: Reflector  
Extraction mode: Delayed  
Polarity: Positive  
Acquisition control: Manual  
Accelerating voltage: 20000 V  
Grid voltage: 66%  
Mirror voltage ratio: 1.12  
Guide wire 0: 0%  
Extraction delay time: 84 nsec  
Acquisition mass range: 300 - 2000 Da  
Number of laser shots: 100/spectrum  
Laser intensity: 1626  
Laser Rep Rate: 20.0 Hz  
Calibration type: External -- D:\CHlee\New Folder\YJD\070410\CM\_0001.d  
Calibration matrix: 2,5-Dihydroxybenzoic acid  
Low mass gate: 250 Da  
Timed ion selector: Off  
Digitizer start time: 25.529  
Bin size: 0.5 nsec  
Number of data points: 80360  
Vertical scale 0: 500 mV  
Vertical offset: -0.1%  
Input bandwidth 0: 500 MHz

Sample well: 74  
Plate ID: PLATE1  
Serial number: 4372  
Instrument name: Voyager-DE STR  
Plate type filename: C:\VOYAGER\100 well plate.pit  
Lab name: PE Biosystems

Absolute x-position: 17439.5  
Absolute y-position: 12231.4  
Relative x-position: 612.047  
Relative y-position: 483.917  
Shots in spectrum: 100  
Source pressure: 9.88e-008  
Mirror pressure: 2.304e-008  
TC2 pressure: 0.001487  
TIS gate width: 8  
TIS flight length: 1187

Acquired: 03:30:00, April 11, 2007

D:\CHlee\New Folder\YJD\070410\YJD-I-106\_0001.dat

Printed: 03:37, April 11, 2007

**Figure 10.**  $^1\text{H}$  NMR titration of receptor **3** (3.0 mM) with tetrabutylammonium fluoride in toluene- $d_8$ / $\text{CD}_3\text{CN}$  (5%).

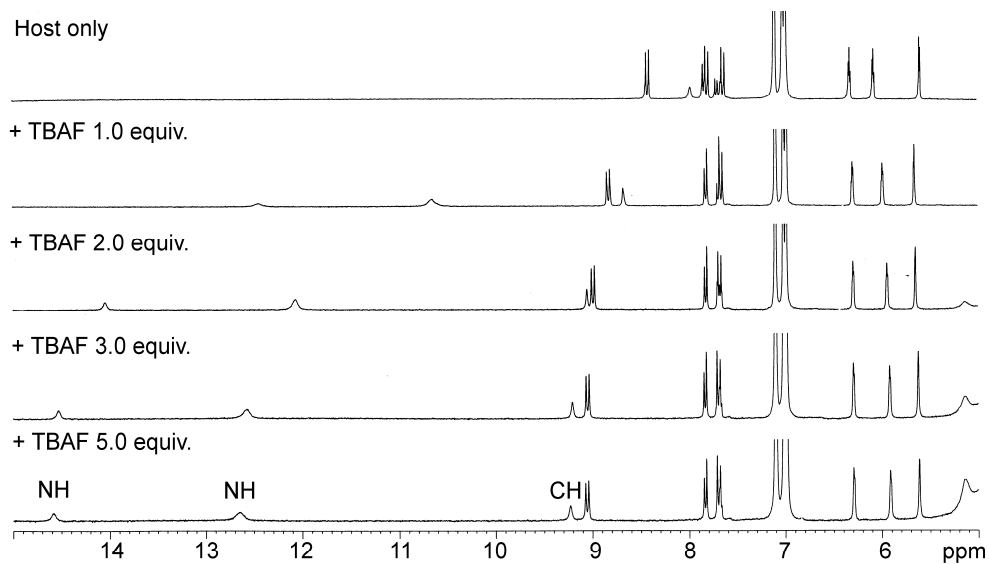



**Figure 11.** Fluorescence spectral changes of receptor **3** ( $7.13 \times 10^{-6}$  M) upon addition of TBAF in toluene /CH<sub>3</sub>CN (5%). ( $\lambda_{\text{ex}} = 357$  nm).

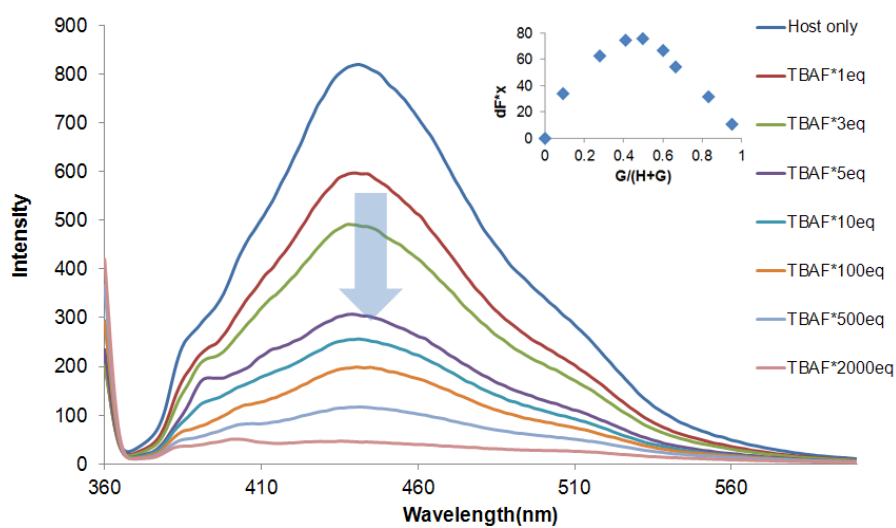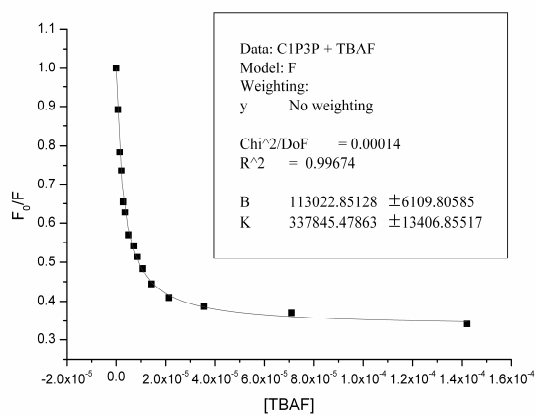

**Figure 12.** Fluorescence spectral changes of receptor **3** ( $7.13 \times 10^{-6}$  M) upon addition of  $C_{60}$  in toluene /CH<sub>3</sub>CN (5%). ( $\lambda_{\text{ex}} = 357$  nm).

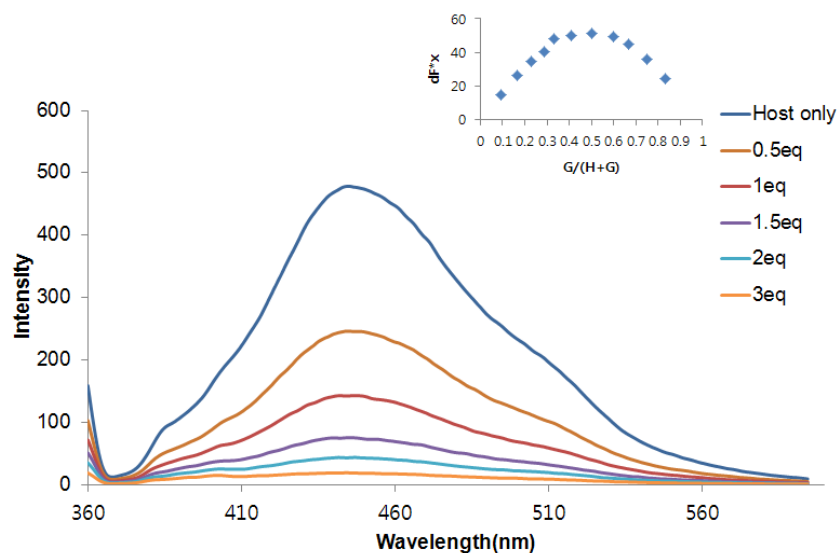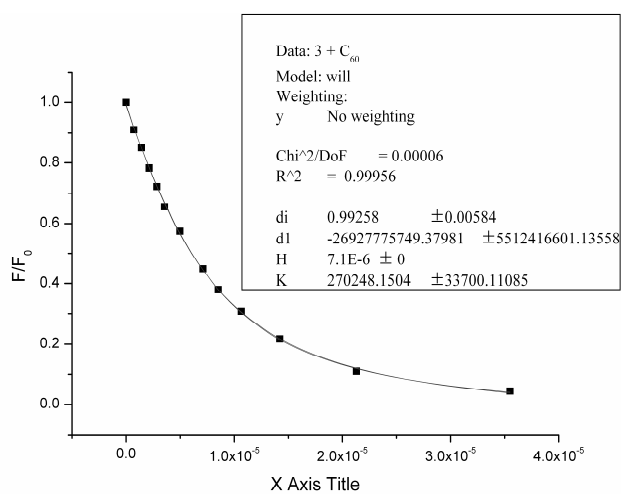

**Figure 13.** Fluorescence spectral changes of receptor **3** ( $7.13 \times 10^{-6}$  M) upon addition of TBAF (3eq) and  $C_{60}$  in toluene /CH<sub>3</sub>CN (5%). ( $\lambda_{\text{ex}} = 357$  nm).

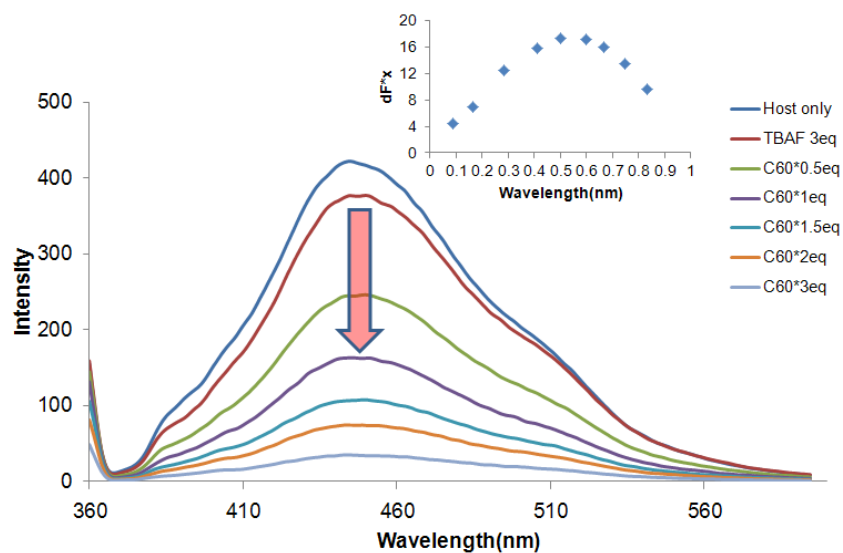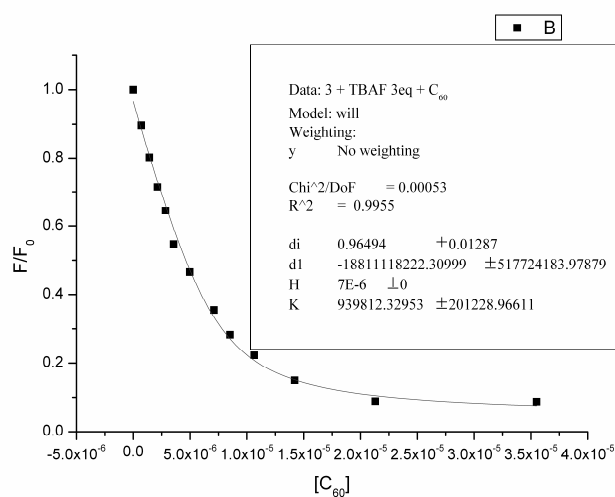

**Figure 14.** Fluorescence spectral changes of receptor **3** ( $7.13 \times 10^{-6}$  M) upon addition of  $C_{70}$  in toluene /CH<sub>3</sub>CN (5%). ( $\lambda_{\text{ex}} = 357$  nm).

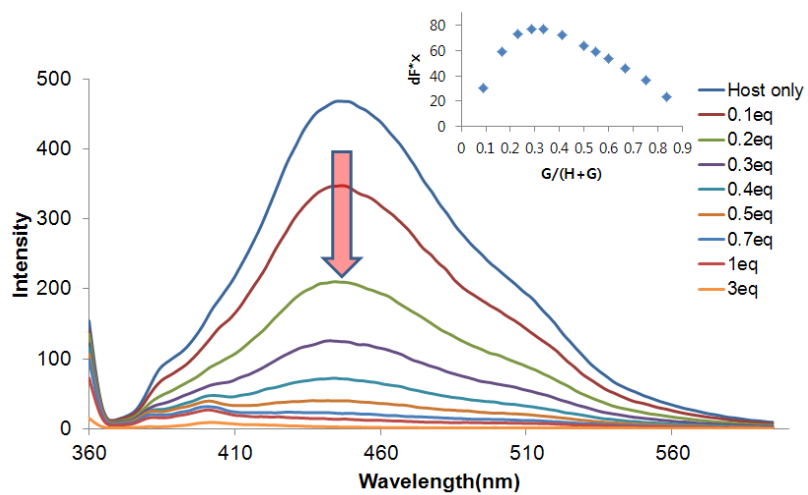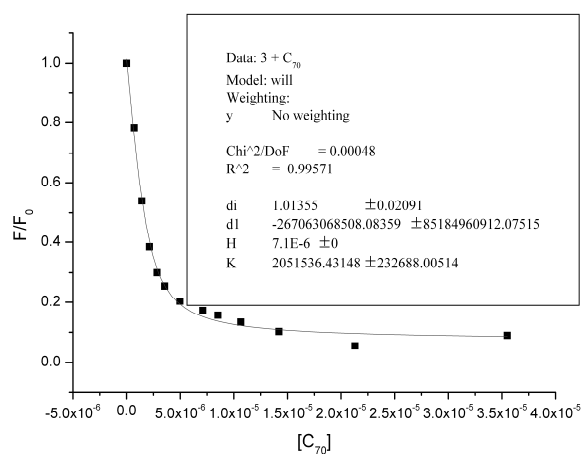

**Figure 15.** Fluorescence spectral changes of receptor **3** ( $7.13 \times 10^{-6}$  M) upon addition of TBAF (3eq) and  $C_{70}$  in toluene /CH<sub>3</sub>CN (5%). ( $\lambda_{ex} = 357$ nm)

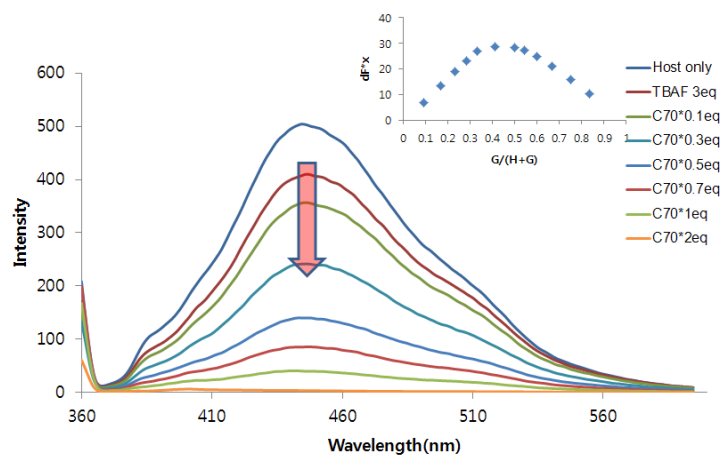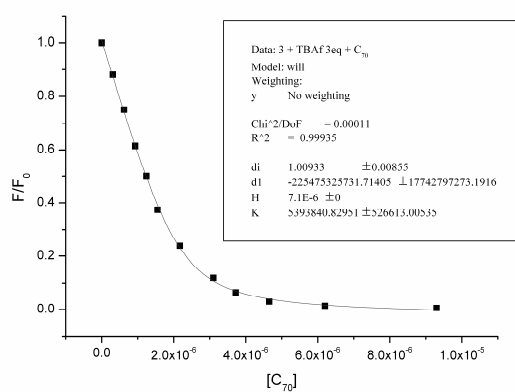

**Figure 16.** Standard calibration curve for detection of  $C_{60}$  with receptor **3**.  $[3] = 7.13 \mu\text{M}$ .

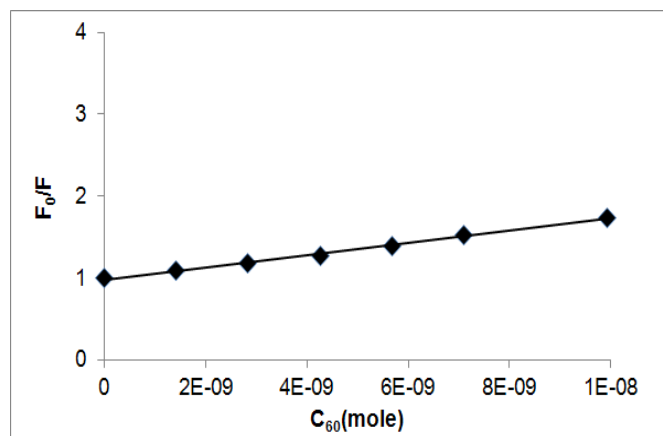

**Figure 17.** Standard calibration curve for detection of  $C_{70}$  with receptor **3**.  $[3] = 7.13 \mu\text{M}$ .

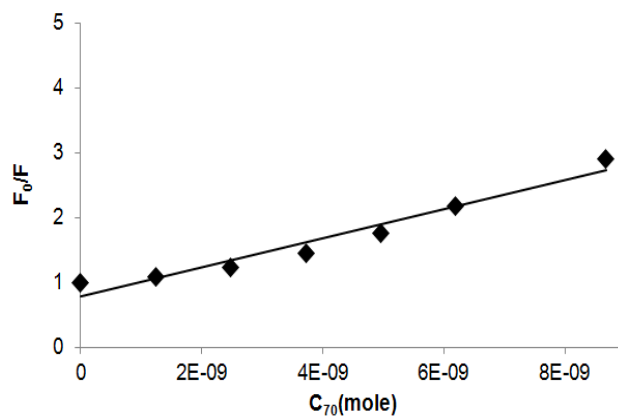

**Figure 18.** top view of receptor **3** showing the atom labeling. Displacement ellipsoids are scaled to the 50% probability level.

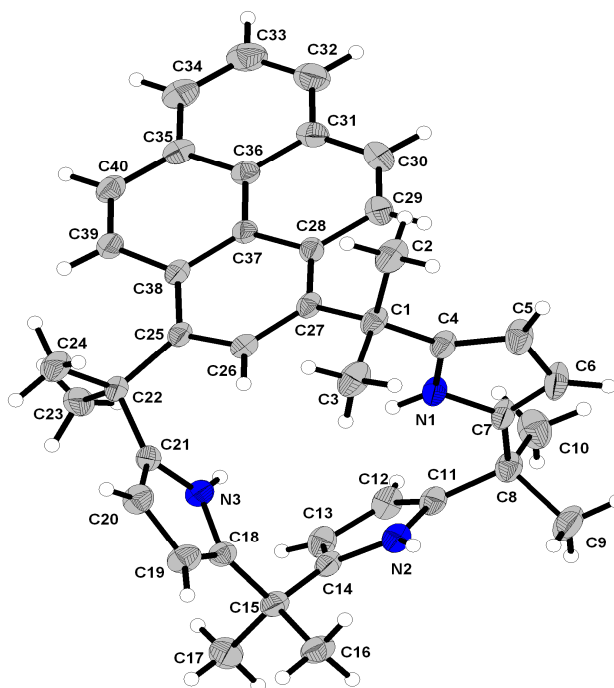

**Figure 19.** View of receptor **3** showing the dimer formation. Displacement ellipsoids are scaled to the 50% probability level.

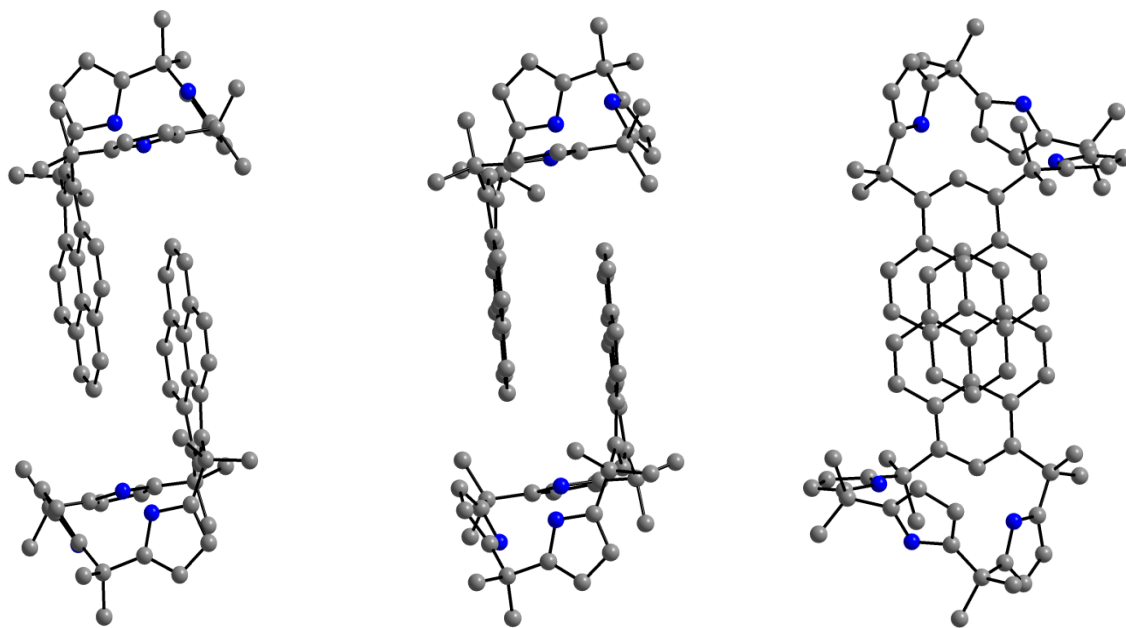

**Table 1.** Crystal data and structure refinement for receptor **3**

|                                   |                                                |                 |
|-----------------------------------|------------------------------------------------|-----------------|
| Empirical formula                 | C <sub>40</sub> H <sub>41</sub> N <sub>3</sub> |                 |
| Formula weight                    | 563.76                                         |                 |
| Temperature                       | 293(2) K                                       |                 |
| Wavelength                        | 0.71073 Å                                      |                 |
| Crystal system                    | Monoclinic                                     |                 |
| Space group                       | P2(1)/n                                        |                 |
| Unit cell dimensions              | a = 10.0878(11) Å                              | ∠ = 90.00°      |
|                                   | b = 32.621(4) Å                                | ∠ = 109.273(2)° |
|                                   | c = 10.2902(11) Å                              | ∠ = 90.00°      |
| Volume                            | 3196.5(6) Å <sup>3</sup>                       |                 |
| Z                                 | 4                                              |                 |
| Density (calculated)              | 1.171 Mg/m <sup>3</sup>                        |                 |
| Absorption coefficient            | 0.068 mm <sup>-1</sup>                         |                 |
| F(000)                            | 1208                                           |                 |
| Crystal size                      | 0.15 x 0.08 x 0.08 mm <sup>3</sup>             |                 |
| Theta range for data collection   | 2.19 to 26.0016.                               |                 |
| Index ranges                      | -12 ≤ h ≤ 12, -33 ≤ k ≤ 40, -11 ≤ l ≤ 12       |                 |
| Reflections collected             | 17811                                          |                 |
| Independent reflections           | 6284 [R(int) = 0.0550]                         |                 |
| Completeness to theta = 26.00     | 99.8 %                                         |                 |
| Absorption correction             | None                                           |                 |
| Refinement method                 | Full-matrix least-squares on F <sup>2</sup>    |                 |
| Data / restraints / parameters    | 6284 / 0 / 408                                 |                 |
| Goodness-of-fit on F <sup>2</sup> | 0.676                                          |                 |
| Final R indices [I > 2σ(I)]       | R1 = 0.0356, wR2 = 0.0648                      |                 |
| R indices (all data)              | R1 = 0.0895, wR2 = 0.0692                      |                 |
| Largest diff. peak and hole       | 0.108 and -0.169 e.Å <sup>-3</sup>             |                 |



**Table 2.** Atomic coordinates ( $\text{\AA} \times 10^4$ ) and equivalent isotropic displacement parameters ( $\text{\AA}^2 \times 10^3$ ) for receptor **3**.  $U(\text{eq})$  is defined as one third of the trace of the orthogonalized  $U^{[3]}$  tensor.

|       | x        | y       | z        | U(eq) |
|-------|----------|---------|----------|-------|
| C(1)  | 9479(2)  | 1324(1) | 2115(2)  | 45(1) |
| C(2)  | 10666(2) | 1195(1) | 1565(2)  | 67(1) |
| C(3)  | 9554(2)  | 1794(1) | 2252(2)  | 64(1) |
| C(4)  | 9708(2)  | 1157(1) | 3539(2)  | 45(1) |
| C(5)  | 10855(2) | 1031(1) | 4584(2)  | 66(1) |
| C(6)  | 10450(2) | 974(1)  | 5766(2)  | 68(1) |
| C(7)  | 9064(2)  | 1061(1) | 5425(2)  | 48(1) |
| C(8)  | 8060(2)  | 1048(1) | 6239(2)  | 51(1) |
| C(9)  | 8756(2)  | 1249(1) | 7658(2)  | 80(1) |
| C(10) | 7726(2)  | 599(1)  | 6458(2)  | 77(1) |
| C(11) | 6722(2)  | 1270(1) | 5477(2)  | 45(1) |
| C(12) | 5367(2)  | 1144(1) | 4981(2)  | 55(1) |
| C(13) | 4527(2)  | 1483(1) | 4343(2)  | 54(1) |
| C(14) | 5371(2)  | 1815(1) | 4445(2)  | 42(1) |
| C(15) | 5048(2)  | 2242(1) | 3889(2)  | 44(1) |
| C(16) | 6052(2)  | 2553(1) | 4844(2)  | 60(1) |
| C(17) | 3532(2)  | 2354(1) | 3800(2)  | 67(1) |
| C(18) | 5165(2)  | 2268(1) | 2462(2)  | 42(1) |
| C(19) | 5456(2)  | 2582(1) | 1731(2)  | 55(1) |
| C(20) | 5300(2)  | 2438(1) | 391(2)   | 53(1) |
| C(21) | 4908(2)  | 2038(1) | 309(2)   | 41(1) |
| C(22) | 4589(2)  | 1720(1) | -825(2)  | 43(1) |
| C(23) | 3077(2)  | 1568(1) | -1025(2) | 65(1) |
| C(24) | 4641(2)  | 1929(1) | -2149(2) | 71(1) |
| C(25) | 5688(2)  | 1373(1) | -417(1)  | 38(1) |
| C(26) | 6983(2)  | 1463(1) | 555(1)   | 41(1) |
| C(27) | 8047(2)  | 1179(1) | 1122(1)  | 39(1) |
| C(28) | 7755(2)  | 764(1)  | 752(2)   | 40(1) |
| C(29) | 8662(2)  | 433(1)  | 1422(2)  | 55(1) |
| C(30) | 8391(2)  | 45(1)   | 998(2)   | 64(1) |
| C(31) | 7200(2)  | -65(1)  | -130(2)  | 52(1) |
| C(32) | 6929(2)  | -465(1) | -585(2)  | 68(1) |
| C(33) | 5758(2)  | -565(1) | -1675(2) | 72(1) |
| C(34) | 4819(2)  | -264(1) | -2335(2) | 65(1) |
| C(35) | 5038(2)  | 141(1)  | -1908(2) | 47(1) |
| C(36) | 6247(2)  | 250(1)  | -787(2)  | 42(1) |

|       |         |         |          |       |
|-------|---------|---------|----------|-------|
| C(37) | 6498(2) | 663(1)  | -333(2)  | 38(1) |
| C(38) | 5491(2) | 974(1)  | -969(2)  | 38(1) |
| C(39) | 4330(2) | 852(1)  | -2156(2) | 47(1) |
| C(40) | 4116(2) | 463(1)  | -2596(2) | 51(1) |
| N(1)  | 8631(2) | 1171(1) | 4064(1)  | 48(1) |
| N(2)  | 6712(2) | 1679(1) | 5138(1)  | 48(1) |
| N(3)  | 4817(1) | 1939(1) | 1578(1)  | 44(1) |

---

**Table 3.** Bond lengths [ $\text{\AA}$ ] and angles [ $^\circ$ ] for receptor **3**

---

|              |            |
|--------------|------------|
| C(1)-C(4)    | 1.509(2)   |
| C(1)-C(3)    | 1.538(2)   |
| C(1)-C(27)   | 1.5430(18) |
| C(1)-C(2)    | 1.543(2)   |
| C(2)-H(2A)   | 0.9600     |
| C(2)-H(2B)   | 0.9600     |
| C(2)-H(2C)   | 0.9600     |
| C(3)-H(3A)   | 0.9600     |
| C(3)-H(3B)   | 0.9600     |
| C(3)-H(3C)   | 0.9600     |
| C(4)-C(5)    | 1.3576(18) |
| C(4)-N(1)    | 1.3642(18) |
| C(5)-C(6)    | 1.417(2)   |
| C(5)-H(5)    | 0.9300     |
| C(6)-C(7)    | 1.3541(19) |
| C(6)-H(6)    | 0.9300     |
| C(7)-N(1)    | 1.3708(18) |
| C(7)-C(8)    | 1.513(2)   |
| C(8)-C(11)   | 1.504(2)   |
| C(8)-C(10)   | 1.535(2)   |
| C(8)-C(9)    | 1.543(2)   |
| C(9)-H(9A)   | 0.9600     |
| C(9)-H(9B)   | 0.9600     |
| C(9)-H(9C)   | 0.9600     |
| C(10)-H(10A) | 0.9600     |
| C(10)-H(10B) | 0.9600     |
| C(10)-H(10C) | 0.9600     |
| C(11)-C(12)  | 1.355(2)   |
| C(11)-N(2)   | 1.377(2)   |
| C(12)-C(13)  | 1.414(2)   |
| C(12)-H(12)  | 0.9300     |
| C(13)-C(14)  | 1.361(2)   |
| C(13)-H(13)  | 0.9300     |
| C(14)-N(2)   | 1.3783(19) |
| C(14)-C(15)  | 1.502(2)   |
| C(15)-C(18)  | 1.513(2)   |
| C(15)-C(16)  | 1.5376(19) |
| C(15)-C(17)  | 1.5460(19) |
| C(16)-H(16A) | 0.9600     |
| C(16)-H(16B) | 0.9600     |

|              |            |
|--------------|------------|
| C(16)-H(16C) | 0.9600     |
| C(17)-H(17A) | 0.9600     |
| C(17)-H(17B) | 0.9600     |
| C(17)-H(17C) | 0.9600     |
| C(18)-C(19)  | 1.358(2)   |
| C(18)-N(3)   | 1.3757(19) |
| C(19)-C(20)  | 1.416(2)   |
| C(19)-H(19)  | 0.9300     |
| C(20)-C(21)  | 1.358(2)   |
| C(20)-H(20)  | 0.9300     |
| C(21)-N(3)   | 1.3766(18) |
| C(21)-C(22)  | 1.513(2)   |
| C(22)-C(24)  | 1.5404(19) |
| C(22)-C(25)  | 1.544(2)   |
| C(22)-C(23)  | 1.5513(19) |
| C(23)-H(23A) | 0.9600     |
| C(23)-H(23B) | 0.9600     |
| C(23)-H(23C) | 0.9600     |
| C(24)-H(24A) | 0.9600     |
| C(24)-H(24B) | 0.9600     |
| C(24)-H(24C) | 0.9600     |
| C(25)-C(26)  | 1.3894(17) |
| C(25)-C(38)  | 1.407(2)   |
| C(26)-C(27)  | 1.3921(19) |
| C(26)-H(26)  | 0.9300     |
| C(27)-C(28)  | 1.409(2)   |
| C(28)-C(37)  | 1.4248(18) |
| C(28)-C(29)  | 1.437(2)   |
| C(29)-C(30)  | 1.338(2)   |
| C(29)-H(29)  | 0.9300     |
| C(30)-C(31)  | 1.414(2)   |
| C(30)-H(30)  | 0.9300     |
| C(31)-C(32)  | 1.384(2)   |
| C(31)-C(36)  | 1.416(2)   |
| C(32)-C(33)  | 1.373(2)   |
| C(32)-H(32)  | 0.9300     |
| C(33)-C(34)  | 1.380(2)   |
| C(33)-H(33)  | 0.9300     |
| C(34)-C(35)  | 1.387(2)   |
| C(34)-H(34)  | 0.9300     |
| C(35)-C(36)  | 1.4186(19) |
| C(35)-C(40)  | 1.426(2)   |

|             |            |
|-------------|------------|
| C(36)-C(37) | 1.422(2)   |
| C(37)-C(38) | 1.4321(19) |
| C(38)-C(39) | 1.4414(18) |
| C(39)-C(40) | 1.341(2)   |
| C(39)-H(39) | 0.9300     |
| C(40)-H(40) | 0.9300     |
| N(1)-H(1N)  | 0.860(14)  |
| N(2)-H(2N)  | 0.848(15)  |
| N(3)-H(3N)  | 0.885(15)  |

|                  |            |
|------------------|------------|
| C(4)-C(1)-C(3)   | 106.53(13) |
| C(4)-C(1)-C(27)  | 109.95(13) |
| C(3)-C(1)-C(27)  | 111.99(13) |
| C(4)-C(1)-C(2)   | 111.63(13) |
| C(3)-C(1)-C(2)   | 106.64(14) |
| C(27)-C(1)-C(2)  | 110.04(12) |
| C(1)-C(2)-H(2A)  | 109.5      |
| C(1)-C(2)-H(2B)  | 109.5      |
| H(2A)-C(2)-H(2B) | 109.5      |
| C(1)-C(2)-H(2C)  | 109.5      |
| H(2A)-C(2)-H(2C) | 109.5      |
| H(2B)-C(2)-H(2C) | 109.5      |
| C(1)-C(3)-H(3A)  | 109.5      |
| C(1)-C(3)-H(3B)  | 109.5      |
| H(3A)-C(3)-H(3B) | 109.5      |
| C(1)-C(3)-H(3C)  | 109.5      |
| H(3A)-C(3)-H(3C) | 109.5      |
| H(3B)-C(3)-H(3C) | 109.5      |
| C(5)-C(4)-N(1)   | 106.23(14) |
| C(5)-C(4)-C(1)   | 134.09(15) |
| N(1)-C(4)-C(1)   | 119.04(14) |
| C(4)-C(5)-C(6)   | 107.85(15) |
| C(4)-C(5)-H(5)   | 126.1      |
| C(6)-C(5)-H(5)   | 126.1      |
| C(7)-C(6)-C(5)   | 108.46(14) |
| C(7)-C(6)-H(6)   | 125.8      |
| C(5)-C(6)-H(6)   | 125.8      |
| C(6)-C(7)-N(1)   | 105.84(15) |
| C(6)-C(7)-C(8)   | 132.35(16) |
| N(1)-C(7)-C(8)   | 121.81(14) |
| C(11)-C(8)-C(7)  | 110.32(14) |
| C(11)-C(8)-C(10) | 109.48(14) |

|                     |            |
|---------------------|------------|
| C(7)-C(8)-C(10)     | 109.17(15) |
| C(11)-C(8)-C(9)     | 109.77(15) |
| C(7)-C(8)-C(9)      | 109.43(13) |
| C(10)-C(8)-C(9)     | 108.64(14) |
| C(8)-C(9)-H(9A)     | 109.5      |
| C(8)-C(9)-H(9B)     | 109.5      |
| H(9A)-C(9)-H(9B)    | 109.5      |
| C(8)-C(9)-H(9C)     | 109.5      |
| H(9A)-C(9)-H(9C)    | 109.5      |
| H(9B)-C(9)-H(9C)    | 109.5      |
| C(8)-C(10)-H(10A)   | 109.5      |
| C(8)-C(10)-H(10B)   | 109.5      |
| H(10A)-C(10)-H(10B) | 109.5      |
| C(8)-C(10)-H(10C)   | 109.5      |
| H(10A)-C(10)-H(10C) | 109.5      |
| H(10B)-C(10)-H(10C) | 109.5      |
| C(12)-C(11)-N(2)    | 105.99(16) |
| C(12)-C(11)-C(8)    | 132.10(18) |
| N(2)-C(11)-C(8)     | 121.91(16) |
| C(11)-C(12)-C(13)   | 108.31(17) |
| C(11)-C(12)-H(12)   | 125.8      |
| C(13)-C(12)-H(12)   | 125.8      |
| C(14)-C(13)-C(12)   | 108.79(16) |
| C(14)-C(13)-H(13)   | 125.6      |
| C(12)-C(13)-H(13)   | 125.6      |
| C(13)-C(14)-N(2)    | 105.38(17) |
| C(13)-C(14)-C(15)   | 131.21(16) |
| N(2)-C(14)-C(15)    | 123.30(15) |
| C(14)-C(15)-C(18)   | 110.22(14) |
| C(14)-C(15)-C(16)   | 110.78(13) |
| C(18)-C(15)-C(16)   | 109.73(14) |
| C(14)-C(15)-C(17)   | 109.13(14) |
| C(18)-C(15)-C(17)   | 108.77(13) |
| C(16)-C(15)-C(17)   | 108.16(14) |
| C(15)-C(16)-H(16A)  | 109.5      |
| C(15)-C(16)-H(16B)  | 109.5      |
| H(16A)-C(16)-H(16B) | 109.5      |
| C(15)-C(16)-H(16C)  | 109.5      |
| H(16A)-C(16)-H(16C) | 109.5      |
| H(16B)-C(16)-H(16C) | 109.5      |
| C(15)-C(17)-H(17A)  | 109.5      |
| C(15)-C(17)-H(17B)  | 109.5      |

|                     |            |
|---------------------|------------|
| H(17A)-C(17)-H(17B) | 109.5      |
| C(15)-C(17)-H(17C)  | 109.5      |
| H(17A)-C(17)-H(17C) | 109.5      |
| H(17B)-C(17)-H(17C) | 109.5      |
| C(19)-C(18)-N(3)    | 106.05(14) |
| C(19)-C(18)-C(15)   | 132.81(17) |
| N(3)-C(18)-C(15)    | 120.87(16) |
| C(18)-C(19)-C(20)   | 108.29(15) |
| C(18)-C(19)-H(19)   | 125.9      |
| C(20)-C(19)-H(19)   | 125.9      |
| C(21)-C(20)-C(19)   | 108.43(15) |
| C(21)-C(20)-H(20)   | 125.8      |
| C(19)-C(20)-H(20)   | 125.8      |
| C(20)-C(21)-N(3)    | 105.95(15) |
| C(20)-C(21)-C(22)   | 133.52(16) |
| N(3)-C(21)-C(22)    | 120.52(16) |
| C(21)-C(22)-C(24)   | 108.57(14) |
| C(21)-C(22)-C(25)   | 110.01(13) |
| C(24)-C(22)-C(25)   | 109.53(13) |
| C(21)-C(22)-C(23)   | 105.71(13) |
| C(24)-C(22)-C(23)   | 110.07(13) |
| C(25)-C(22)-C(23)   | 112.81(14) |
| C(22)-C(23)-H(23A)  | 109.5      |
| C(22)-C(23)-H(23B)  | 109.5      |
| H(23A)-C(23)-H(23B) | 109.5      |
| C(22)-C(23)-H(23C)  | 109.5      |
| H(23A)-C(23)-H(23C) | 109.5      |
| H(23B)-C(23)-H(23C) | 109.5      |
| C(22)-C(24)-H(24A)  | 109.5      |
| C(22)-C(24)-H(24B)  | 109.5      |
| H(24A)-C(24)-H(24B) | 109.5      |
| C(22)-C(24)-H(24C)  | 109.5      |
| H(24A)-C(24)-H(24C) | 109.5      |
| H(24B)-C(24)-H(24C) | 109.5      |
| C(26)-C(25)-C(38)   | 117.41(14) |
| C(26)-C(25)-C(22)   | 117.40(15) |
| C(38)-C(25)-C(22)   | 125.18(14) |
| C(25)-C(26)-C(27)   | 124.93(15) |
| C(25)-C(26)-H(26)   | 117.5      |
| C(27)-C(26)-H(26)   | 117.5      |
| C(26)-C(27)-C(28)   | 117.51(14) |
| C(26)-C(27)-C(1)    | 119.77(16) |

|                   |            |
|-------------------|------------|
| C(28)-C(27)-C(1)  | 122.73(15) |
| C(27)-C(28)-C(37) | 119.17(15) |
| C(27)-C(28)-C(29) | 123.29(15) |
| C(37)-C(28)-C(29) | 117.54(16) |
| C(30)-C(29)-C(28) | 121.75(17) |
| C(30)-C(29)-H(29) | 119.1      |
| C(28)-C(29)-H(29) | 119.1      |
| C(29)-C(30)-C(31) | 122.33(17) |
| C(29)-C(30)-H(30) | 118.8      |
| C(31)-C(30)-H(30) | 118.8      |
| C(32)-C(31)-C(30) | 122.46(19) |
| C(32)-C(31)-C(36) | 119.66(18) |
| C(30)-C(31)-C(36) | 117.86(18) |
| C(33)-C(32)-C(31) | 121.44(19) |
| C(33)-C(32)-H(32) | 119.3      |
| C(31)-C(32)-H(32) | 119.3      |
| C(32)-C(33)-C(34) | 119.9(2)   |
| C(32)-C(33)-H(33) | 120.1      |
| C(34)-C(33)-H(33) | 120.1      |
| C(33)-C(34)-C(35) | 120.81(19) |
| C(33)-C(34)-H(34) | 119.6      |
| C(35)-C(34)-H(34) | 119.6      |
| C(34)-C(35)-C(36) | 119.93(18) |
| C(34)-C(35)-C(40) | 122.26(18) |
| C(36)-C(35)-C(40) | 117.75(17) |
| C(31)-C(36)-C(35) | 118.30(17) |
| C(31)-C(36)-C(37) | 120.71(16) |
| C(35)-C(36)-C(37) | 121.00(16) |
| C(36)-C(37)-C(28) | 119.60(15) |
| C(36)-C(37)-C(38) | 119.93(15) |
| C(28)-C(37)-C(38) | 120.47(16) |
| C(25)-C(38)-C(37) | 119.08(14) |
| C(25)-C(38)-C(39) | 124.35(15) |
| C(37)-C(38)-C(39) | 116.57(15) |
| C(40)-C(39)-C(38) | 122.86(16) |
| C(40)-C(39)-H(39) | 118.6      |
| C(38)-C(39)-H(39) | 118.6      |
| C(39)-C(40)-C(35) | 121.52(16) |
| C(39)-C(40)-H(40) | 119.2      |
| C(35)-C(40)-H(40) | 119.2      |
| C(4)-N(1)-C(7)    | 111.61(14) |
| C(4)-N(1)-H(1N)   | 127.6(11)  |



|                  |            |
|------------------|------------|
| C(7)-N(1)-H(1N)  | 120.8(11)  |
| C(11)-N(2)-C(14) | 111.53(15) |
| C(11)-N(2)-H(2N) | 125.7(12)  |
| C(14)-N(2)-H(2N) | 122.7(12)  |
| C(18)-N(3)-C(21) | 111.27(15) |
| C(18)-N(3)-H(3N) | 122.3(10)  |
| C(21)-N(3)-H(3N) | 126.0(10)  |

---

Symmetry transformations used to generate equivalent atoms:

**Table 4.** Anisotropic displacement parameters ( $\text{\AA}^2 \times 10^3$ ) for receptor **3**. The anisotropic displacement factor exponent takes the form:  $-2\pi^2 [h^2 a^{*2} U^{11} + \dots + 2 h k a^* b^* U^{12}]$

|       | U11    | U22    | U33   | U23    | U13   | U12    |
|-------|--------|--------|-------|--------|-------|--------|
| C(1)  | 32(1)  | 68(1)  | 34(1) | -6(1)  | 9(1)  | -10(1) |
| C(2)  | 39(1)  | 117(2) | 49(1) | -8(1)  | 18(1) | -7(1)  |
| C(3)  | 55(1)  | 79(2)  | 52(1) | -7(1)  | 9(1)  | -28(1) |
| C(4)  | 30(1)  | 70(1)  | 35(1) | -1(1)  | 11(1) | -4(1)  |
| C(5)  | 35(1)  | 113(2) | 48(1) | 12(1)  | 12(1) | 6(1)   |
| C(6)  | 43(1)  | 113(2) | 39(1) | 16(1)  | 2(1)  | 4(1)   |
| C(7)  | 40(1)  | 70(1)  | 30(1) | 6(1)   | 7(1)  | 1(1)   |
| C(8)  | 52(1)  | 65(2)  | 37(1) | 8(1)   | 15(1) | 0(1)   |
| C(9)  | 71(1)  | 131(2) | 34(1) | -4(1)  | 14(1) | 11(1)  |
| C(10) | 73(1)  | 87(2)  | 77(1) | 32(1)  | 31(1) | 9(1)   |
| C(11) | 48(1)  | 56(1)  | 34(1) | 6(1)   | 17(1) | -4(1)  |
| C(12) | 53(1)  | 62(2)  | 49(1) | 3(1)   | 14(1) | -14(1) |
| C(13) | 40(1)  | 67(2)  | 49(1) | -2(1)  | 6(1)  | -9(1)  |
| C(14) | 35(1)  | 59(1)  | 32(1) | -6(1)  | 11(1) | -4(1)  |
| C(15) | 39(1)  | 55(1)  | 40(1) | -8(1)  | 14(1) | -3(1)  |
| C(16) | 64(1)  | 61(1)  | 53(1) | -17(1) | 19(1) | -6(1)  |
| C(17) | 50(1)  | 87(2)  | 67(1) | -1(1)  | 24(1) | 10(1)  |
| C(18) | 42(1)  | 43(1)  | 40(1) | -7(1)  | 12(1) | -4(1)  |
| C(19) | 68(1)  | 45(1)  | 52(1) | -9(1)  | 21(1) | -14(1) |
| C(20) | 66(1)  | 48(1)  | 46(1) | 6(1)   | 21(1) | -4(1)  |
| C(21) | 47(1)  | 41(1)  | 34(1) | 6(1)   | 13(1) | 5(1)   |
| C(22) | 48(1)  | 45(1)  | 31(1) | 0(1)   | 5(1)  | 5(1)   |
| C(23) | 44(1)  | 72(2)  | 67(1) | -18(1) | 2(1)  | 11(1)  |
| C(24) | 108(2) | 65(2)  | 38(1) | 7(1)   | 20(1) | 15(1)  |
| C(25) | 40(1)  | 45(1)  | 28(1) | 1(1)   | 10(1) | -1(1)  |
| C(26) | 44(1)  | 44(1)  | 34(1) | -4(1)  | 13(1) | -5(1)  |
| C(27) | 34(1)  | 56(1)  | 29(1) | -2(1)  | 12(1) | -4(1)  |
| C(28) | 33(1)  | 52(1)  | 34(1) | 2(1)   | 12(1) | 4(1)   |
| C(29) | 43(1)  | 62(2)  | 54(1) | -1(1)  | 8(1)  | 7(1)   |
| C(30) | 56(1)  | 63(2)  | 68(1) | 5(1)   | 14(1) | 19(1)  |
| C(31) | 57(1)  | 49(2)  | 55(1) | -4(1)  | 26(1) | 4(1)   |
| C(32) | 80(2)  | 55(2)  | 73(2) | -2(1)  | 32(1) | 10(1)  |
| C(33) | 102(2) | 46(2)  | 76(2) | -11(1) | 38(1) | -4(1)  |
| C(34) | 77(2)  | 61(2)  | 59(1) | -15(1) | 24(1) | -14(1) |
| C(35) | 52(1)  | 49(1)  | 44(1) | -10(1) | 20(1) | -10(1) |

|       |       |       |       |        |       |       |
|-------|-------|-------|-------|--------|-------|-------|
| C(36) | 46(1) | 46(1) | 38(1) | -2(1)  | 20(1) | 1(1)  |
| C(37) | 35(1) | 47(1) | 33(1) | -2(1)  | 12(1) | 3(1)  |
| C(38) | 36(1) | 49(1) | 29(1) | -3(1)  | 10(1) | -5(1) |
| C(39) | 43(1) | 56(1) | 38(1) | -5(1)  | 9(1)  | 3(1)  |
| C(40) | 46(1) | 63(2) | 40(1) | -13(1) | 8(1)  | -7(1) |
| N(1)  | 34(1) | 76(1) | 33(1) | 5(1)   | 10(1) | 3(1)  |
| N(2)  | 38(1) | 63(1) | 44(1) | -1(1)  | 14(1) | -9(1) |
| N(3)  | 56(1) | 37(1) | 39(1) | 1(1)   | 16(1) | -5(1) |

---

**Table 5.** Hydrogen coordinates ( $\text{\AA} \times 10^4$ ) and isotropic displacement parameters ( $\text{\AA}^2 \times 10^3$ ) for receptor **3**

|        | x     | y    | z     | U(eq) |
|--------|-------|------|-------|-------|
| H(2A)  | 11553 | 1283 | 2195  | 101   |
| H(2B)  | 10516 | 1318 | 681   | 101   |
| H(2C)  | 10666 | 902  | 1475  | 101   |
| H(3A)  | 8869  | 1887 | 2648  | 96    |
| H(3B)  | 9366  | 1915 | 1359  | 96    |
| H(3C)  | 10475 | 1873 | 2836  | 96    |
| H(5)   | 11749 | 990  | 4534  | 79    |
| H(6)   | 11036 | 891  | 6629  | 81    |
| H(9A)  | 8999  | 1527 | 7535  | 119   |
| H(9B)  | 9589  | 1099 | 8155  | 119   |
| H(9C)  | 8113  | 1245 | 8168  | 119   |
| H(10A) | 7070  | 589  | 6953  | 116   |
| H(10B) | 8575  | 460  | 6977  | 116   |
| H(10C) | 7325  | 467  | 5581  | 116   |
| H(12)  | 5045  | 881  | 5050  | 66    |
| H(13)  | 3558  | 1478 | 3922  | 64    |
| H(16A) | 6993  | 2502 | 4857  | 90    |
| H(16B) | 6010  | 2526 | 5759  | 90    |
| H(16C) | 5778  | 2826 | 4513  | 90    |
| H(17A) | 3320  | 2628 | 3446  | 100   |
| H(17B) | 3446  | 2339 | 4701  | 100   |
| H(17C) | 2886  | 2165 | 3197  | 100   |
| H(19)  | 5713  | 2846 | 2055  | 66    |
| H(20)  | 5442  | 2591 | -314  | 63    |
| H(23A) | 3099  | 1377 | -311  | 98    |
| H(23B) | 2701  | 1437 | -1906 | 98    |
| H(23C) | 2496  | 1798 | -983  | 98    |
| H(24A) | 3951  | 2144 | -2407 | 107   |
| H(24B) | 4448  | 1731 | -2876 | 107   |
| H(24C) | 5558  | 2044 | -1989 | 107   |
| H(26)  | 7152  | 1733 | 848   | 49    |
| H(29)  | 9459  | 490  | 2170  | 66    |
| H(30)  | 9008  | -160 | 1461  | 77    |
| H(32)  | 7553  | -671 | -143  | 81    |
| H(33)  | 5599  | -836 | -1969 | 87    |
| H(34)  | 4029  | -332 | -3075 | 78    |
| H(39)  | 3701  | 1052 | -2637 | 56    |

|       |          |         |          |       |
|-------|----------|---------|----------|-------|
| H(40) | 3349     | 401     | -3369    | 61    |
| H(1N) | 7779(16) | 1247(5) | 3649(16) | 77(7) |
| H(2N) | 7424(16) | 1834(5) | 5342(16) | 67(7) |
| H(3N) | 4657(15) | 1692(5) | 1850(15) | 63(6) |

---

**Table 6.** Torsion angles [°] for receptor **3**

---

|                         |             |
|-------------------------|-------------|
| C(3)-C(1)-C(4)-C(5)     | -92.2(2)    |
| C(27)-C(1)-C(4)-C(5)    | 146.2(2)    |
| C(2)-C(1)-C(4)-C(5)     | 23.8(3)     |
| C(3)-C(1)-C(4)-N(1)     | 77.13(18)   |
| C(27)-C(1)-C(4)-N(1)    | -44.4(2)    |
| C(2)-C(1)-C(4)-N(1)     | -166.84(15) |
| N(1)-C(4)-C(5)-C(6)     | -0.7(2)     |
| C(1)-C(4)-C(5)-C(6)     | 169.59(19)  |
| C(4)-C(5)-C(6)-C(7)     | 0.6(2)      |
| C(5)-C(6)-C(7)-N(1)     | -0.3(2)     |
| C(5)-C(6)-C(7)-C(8)     | 178.67(18)  |
| C(6)-C(7)-C(8)-C(11)    | 166.4(2)    |
| N(1)-C(7)-C(8)-C(11)    | -14.8(2)    |
| C(6)-C(7)-C(8)-C(10)    | -73.2(2)    |
| N(1)-C(7)-C(8)-C(10)    | 105.56(18)  |
| C(6)-C(7)-C(8)-C(9)     | 45.5(3)     |
| N(1)-C(7)-C(8)-C(9)     | -135.66(16) |
| C(7)-C(8)-C(11)-C(12)   | 119.68(19)  |
| C(10)-C(8)-C(11)-C(12)  | -0.5(2)     |
| C(9)-C(8)-C(11)-C(12)   | -119.6(2)   |
| C(7)-C(8)-C(11)-N(2)    | -59.8(2)    |
| C(10)-C(8)-C(11)-N(2)   | -179.91(14) |
| C(9)-C(8)-C(11)-N(2)    | 60.92(19)   |
| N(2)-C(11)-C(12)-C(13)  | -0.35(19)   |
| C(8)-C(11)-C(12)-C(13)  | -179.85(16) |
| C(11)-C(12)-C(13)-C(14) | 0.2(2)      |
| C(12)-C(13)-C(14)-N(2)  | 0.11(19)    |
| C(12)-C(13)-C(14)-C(15) | 176.35(15)  |
| C(13)-C(14)-C(15)-C(18) | -89.1(2)    |
| N(2)-C(14)-C(15)-C(18)  | 86.56(17)   |
| C(13)-C(14)-C(15)-C(16) | 149.27(17)  |
| N(2)-C(14)-C(15)-C(16)  | -35.1(2)    |
| C(13)-C(14)-C(15)-C(17) | 30.3(2)     |
| N(2)-C(14)-C(15)-C(17)  | -154.05(14) |

|                         |             |
|-------------------------|-------------|
| C(14)-C(15)-C(18)-C(19) | -153.62(18) |
| C(16)-C(15)-C(18)-C(19) | -31.4(2)    |
| C(17)-C(15)-C(18)-C(19) | 86.8(2)     |
| C(14)-C(15)-C(18)-N(3)  | 33.2(2)     |
| C(16)-C(15)-C(18)-N(3)  | 155.47(15)  |
| C(17)-C(15)-C(18)-N(3)  | -86.40(18)  |
| N(3)-C(18)-C(19)-C(20)  | -0.83(19)   |
| C(15)-C(18)-C(19)-C(20) | -174.73(16) |
| C(18)-C(19)-C(20)-C(21) | 0.3(2)      |
| C(19)-C(20)-C(21)-N(3)  | 0.33(18)    |
| C(19)-C(20)-C(21)-C(22) | -179.82(16) |
| C(20)-C(21)-C(22)-C(24) | -5.1(2)     |
| N(3)-C(21)-C(22)-C(24)  | 174.71(13)  |
| C(20)-C(21)-C(22)-C(25) | 114.7(2)    |
| N(3)-C(21)-C(22)-C(25)  | -65.44(18)  |
| C(20)-C(21)-C(22)-C(23) | -123.19(19) |
| N(3)-C(21)-C(22)-C(23)  | 56.64(18)   |
| C(21)-C(22)-C(25)-C(26) | -23.07(19)  |
| C(24)-C(22)-C(25)-C(26) | 96.19(16)   |
| C(23)-C(22)-C(25)-C(26) | -140.84(14) |
| C(21)-C(22)-C(25)-C(38) | 158.14(14)  |
| C(24)-C(22)-C(25)-C(38) | -82.60(19)  |
| C(23)-C(22)-C(25)-C(38) | 40.4(2)     |
| C(38)-C(25)-C(26)-C(27) | -6.7(2)     |
| C(22)-C(25)-C(26)-C(27) | 174.38(14)  |
| C(25)-C(26)-C(27)-C(28) | -4.4(2)     |
| C(25)-C(26)-C(27)-C(1)  | 175.55(13)  |
| C(4)-C(1)-C(27)-C(26)   | 113.76(16)  |
| C(3)-C(1)-C(27)-C(26)   | -4.47(19)   |
| C(2)-C(1)-C(27)-C(26)   | -122.89(16) |
| C(4)-C(1)-C(27)-C(28)   | -66.30(19)  |
| C(3)-C(1)-C(27)-C(28)   | 175.48(14)  |
| C(2)-C(1)-C(27)-C(28)   | 57.06(19)   |
| C(26)-C(27)-C(28)-C(37) | 10.0(2)     |
| C(1)-C(27)-C(28)-C(37)  | -169.96(13) |
| C(26)-C(27)-C(28)-C(29) | -169.61(14) |
| C(1)-C(27)-C(28)-C(29)  | 10.4(2)     |
| C(27)-C(28)-C(29)-C(30) | -176.46(16) |
| C(37)-C(28)-C(29)-C(30) | 3.9(2)      |
| C(28)-C(29)-C(30)-C(31) | -0.1(3)     |
| C(29)-C(30)-C(31)-C(32) | 178.92(17)  |
| C(29)-C(30)-C(31)-C(36) | -2.4(3)     |

|                         |             |
|-------------------------|-------------|
| C(30)-C(31)-C(32)-C(33) | 179.41(17)  |
| C(36)-C(31)-C(32)-C(33) | 0.7(3)      |
| C(31)-C(32)-C(33)-C(34) | -0.4(3)     |
| C(32)-C(33)-C(34)-C(35) | -0.2(3)     |
| C(33)-C(34)-C(35)-C(36) | 0.6(3)      |
| C(33)-C(34)-C(35)-C(40) | 177.69(17)  |
| C(32)-C(31)-C(36)-C(35) | -0.4(2)     |
| C(30)-C(31)-C(36)-C(35) | -179.13(14) |
| C(32)-C(31)-C(36)-C(37) | 179.64(15)  |
| C(30)-C(31)-C(36)-C(37) | 0.9(2)      |
| C(34)-C(35)-C(36)-C(31) | -0.2(2)     |
| C(40)-C(35)-C(36)-C(31) | -177.50(14) |
| C(34)-C(35)-C(36)-C(37) | 179.72(15)  |
| C(40)-C(35)-C(36)-C(37) | 2.5(2)      |
| C(31)-C(36)-C(37)-C(28) | 2.9(2)      |
| C(35)-C(36)-C(37)-C(28) | -177.02(13) |
| C(31)-C(36)-C(37)-C(38) | -177.16(14) |
| C(35)-C(36)-C(37)-C(38) | 2.9(2)      |
| C(27)-C(28)-C(37)-C(36) | 175.12(14)  |
| C(29)-C(28)-C(37)-C(36) | -5.3(2)     |
| C(27)-C(28)-C(37)-C(38) | -4.8(2)     |
| C(29)-C(28)-C(37)-C(38) | 174.85(14)  |
| C(26)-C(25)-C(38)-C(37) | 11.9(2)     |
| C(22)-C(25)-C(38)-C(37) | -169.31(14) |
| C(26)-C(25)-C(38)-C(39) | -167.89(13) |
| C(22)-C(25)-C(38)-C(39) | 10.9(2)     |
| C(36)-C(37)-C(38)-C(25) | 173.64(14)  |
| C(28)-C(37)-C(38)-C(25) | -6.5(2)     |
| C(36)-C(37)-C(38)-C(39) | -6.6(2)     |
| C(28)-C(37)-C(38)-C(39) | 173.34(13)  |
| C(25)-C(38)-C(39)-C(40) | -174.95(15) |
| C(37)-C(38)-C(39)-C(40) | 5.3(2)      |
| C(38)-C(39)-C(40)-C(35) | 0.0(2)      |
| C(34)-C(35)-C(40)-C(39) | 178.84(16)  |
| C(36)-C(35)-C(40)-C(39) | -4.0(2)     |
| C(5)-C(4)-N(1)-C(7)     | 0.6(2)      |
| C(1)-C(4)-N(1)-C(7)     | -171.48(15) |
| C(6)-C(7)-N(1)-C(4)     | -0.2(2)     |
| C(8)-C(7)-N(1)-C(4)     | -179.27(16) |
| C(12)-C(11)-N(2)-C(14)  | 0.44(18)    |
| C(8)-C(11)-N(2)-C(14)   | 180.00(14)  |
| C(13)-C(14)-N(2)-C(11)  | -0.34(18)   |

|                        |             |
|------------------------|-------------|
| C(15)-C(14)-N(2)-C(11) | -176.95(14) |
| C(19)-C(18)-N(3)-C(21) | 1.07(18)    |
| C(15)-C(18)-N(3)-C(21) | 175.86(13)  |
| C(20)-C(21)-N(3)-C(18) | -0.87(18)   |
| C(22)-C(21)-N(3)-C(18) | 179.25(13)  |

---

Symmetry transformations used to generate equivalent atoms:
